# Supplementary material for: Artesunate-induced mitophagy alters cellular redox status
Source: PubMed Central journal article supplement (PMC6128040; doi:10.1016/j.redox.2018.07.025), 2018-08-04
Supplement: mmc9.pdf [file mmc9.pdf]

## Supplementary table 1. List of ART targets

| No. | Unused Score <sup>1</sup> | % Cov (95) <sup>2</sup> | Accession #  | Name                                                           | Species | Peptides(95%) <sup>3</sup> |
|-----|---------------------------|-------------------------|--------------|----------------------------------------------------------------|---------|----------------------------|
| 1   | 171.09                    | 28.3                    | Q14204 DYHC1 | Cytoplasmic dynein 1 heavy chain 1                             | HUMAN   | 93                         |
| 2   | 157.06                    | 50.4                    | Q13085 ACACA | Acetyl-CoA carboxylase 1                                       | HUMAN   | 95                         |
| 3   | 137.17                    | 43.4                    | P49327 FAS   | Fatty acid synthase                                            | HUMAN   | 77                         |
| 4   | 114.99                    | 57.7                    | P31327 CPSM  | Carbamoyl-phosphate synthase [ammonia], mitochondrial          | HUMAN   | 81                         |
| 5   | 113.47                    | 36.5                    | Q6P2Q9 PRP8  | Pre-mRNA-processing-splicing factor 8                          | HUMAN   | 63                         |
| 6   | 101.29                    | 56.9                    | P11498 PYC   | Pyruvate carboxylase, mitochondrial                            | HUMAN   | 82                         |
| 7   | 82.54                     | 31.7                    | P27708 PYR1  | CAD protein                                                    | HUMAN   | 45                         |
| 8   | 81.76                     | 21.6                    | Q92616 GCN1  | eIF-2-alpha kinase activator GCN1                              | HUMAN   | 41                         |
| 9   | 78.66                     | 25.7                    | O75369 FLNB  | Filamin-B                                                      | HUMAN   | 46                         |
| 10  | 68.85                     | 36.4                    | Q00610 CLH1  | Clathrin heavy chain 1                                         | HUMAN   | 40                         |
| 11  | 59.7                      | 32.5                    | Q08211 DHX9  | ATP-dependent RNA helicase A                                   | HUMAN   | 31                         |
| 12  | 59.29                     | 11.3                    | Q15149 PLEC  | Plectin                                                        | HUMAN   | 28                         |
| 13  | 57.25                     | 19.4                    | O75643 U520  | U5 small nuclear ribonucleoprotein 200 kDa helicase            | HUMAN   | 31                         |
| 14  | 55.53                     | 31.9                    | P16615 AT2A2 | Sarcoplasmic/endoplasmic reticulum calcium ATPase 2            | HUMAN   | 30                         |
| 15  | 50.86                     | 50.5                    | P49748 ACADV | Very long-chain specific acyl-CoA dehydrogenase, mitochondrial | HUMAN   | 31                         |
| 16  | 50.48                     | 49.5                    | P40939 ECHA  | Trifunctional enzyme subunit alpha, mitochondrial              | HUMAN   | 33                         |
| 17  | 46.52                     | 12.5                    | P15924 DESP  | Desmoplakin                                                    | HUMAN   | 25                         |
| 18  | 44.91                     | 74.8                    | P07437 TBB5  | Tubulin beta chain                                             | HUMAN   | 32                         |
| 19  | 44.74                     | 36.7                    | P02786 TFR1  | Transferrin receptor protein 1                                 | HUMAN   | 24                         |
| 20  | 42.3                      | 24.1                    | P41252 SYIC  | Isoleucine--tRNA ligase, cytoplasmic                           | HUMAN   | 22                         |
| 21  | 37.73                     | 25.8                    | P26640 SYVC  | Valine--tRNA ligase                                            | HUMAN   | 19                         |
| 22  | 35.44                     | 26.3                    | P58107 EPIPL | Epiplakin                                                      | HUMAN   | 21                         |
| 23  | 33.06                     | 15.5                    | Q9NZM1 MYOF  | Myoferlin                                                      | HUMAN   | 17                         |
| 24  | 31.63                     | 19.2                    | P42704 LPPRC | Leucine-rich PPR motif-containing protein, mitochondrial       | HUMAN   | 16                         |
| 25  | 31.29                     | 62.1                    | P60709 ACTB  | Actin, cytoplasmic 1                                           | HUMAN   | 23                         |
| 26  | 29                        | 20.9                    | Q7L2E3 DHX30 | Putative ATP-dependent RNA helicase DHX30                      | HUMAN   | 15                         |
| 27  | 28.79                     | 26.7                    | P08238 HS90B | Heat shock protein HSP 90-beta                                 | HUMAN   | 14                         |
| 28  | 27.97                     | 23.9                    | P13639 EF2   | Elongation factor 2                                            | HUMAN   | 14                         |
| 29  | 27.44                     | 33.4                    | Q07065 CKAP4 | Cytoskeleton-associated protein 4                              | HUMAN   | 14                         |
| 30  | 27.31                     | 12.4                    | Q09666 AHNK  | Neuroblast differentiation-associated protein AHNK             | HUMAN   | 15                         |
| 31  | 26.4                      | 33.7                    | P10809 CH60  | 60 kDa heat shock protein, mitochondrial                       | HUMAN   | 16                         |
| 32  | 26.18                     | 28.6                    | P05165 PCCA  | Propionyl-CoA carboxylase alpha chain, mitochondrial           | HUMAN   | 14                         |
| 33  | 24.45                     | 16.2                    | Q6UB35 C1TM  | Monofunctional C1-tetrahydrofolate synthase, mitochondrial     | HUMAN   | 13                         |
| 34  | 24.38                     | 53.8                    | P30519 HMOX2 | Heme oxygenase 2                                               | HUMAN   | 16                         |
| 35  | 24.15                     | 16.4                    | O00410 IPO5  | Importin-5                                                     | HUMAN   | 12                         |
| 36  | 23.88                     | 34.1                    | P14618 KPYM  | Pyruvate kinase PKM                                            | HUMAN   | 13                         |
| 37  | 22.91                     | 9.3                     | Q92621 NU205 | Nuclear pore complex protein Nup205                            | HUMAN   | 13                         |
| 38  | 22.35                     | 14.7                    | P53396 ACLY  | ATP-citrate synthase                                           | HUMAN   | 11                         |
| 39  | 22                        | 23.2                    | Q92945 FUBP2 | Far upstream element-binding protein 2                         | HUMAN   | 11                         |
| 40  | 21.32                     | 36.1                    | P34897 GLYM  | Serine hydroxymethyltransferase, mitochondrial                 | HUMAN   | 12                         |
| 41  | 20.21                     | 14.4                    | P53621 COPA  | Coatomer subunit alpha                                         | HUMAN   | 10                         |
| 42  | 20                        | 23.2                    | P50990 TCPQ  | T-complex protein 1 subunit theta                              | HUMAN   | 10                         |
| 43  | 18                        | 19.9                    | P02545 LMNA  | Prelamin-A/C                                                   | HUMAN   | 9                          |

|    |       |      |              |                                                              |       |    |
|----|-------|------|--------------|--------------------------------------------------------------|-------|----|
| 44 | 17.89 | 21.1 | Q9BQ52 RNZ2  | Zinc phosphodiesterase ELAC protein 2                        | HUMAN | 10 |
| 45 | 17.79 | 34.1 | P00558 PGK1  | Phosphoglycerate kinase 1                                    | HUMAN | 9  |
| 46 | 17.79 | 4.4  | Q5T4S7 UBR4  | E3 ubiquitin-protein ligase UBR4                             | HUMAN | 11 |
| 47 | 17.65 | 20.7 | Q5T9A4 ATD3B | ATPase family AAA domain-containing protein 3B               | HUMAN | 9  |
| 48 | 17.57 | 46.4 | Q15365 PCBP1 | Poly(rC)-binding protein 1                                   | HUMAN | 9  |
| 49 | 17    | 39.1 | P63244 RACK1 | Receptor of activated protein C kinase 1                     | HUMAN | 9  |
| 50 | 16.65 | 54.6 | Q13162 PRDX4 | Peroxiredoxin-4                                              | HUMAN | 8  |
| 51 | 16    | 24.3 | Q9Y6M5 ZNT1  | Zinc transporter 1                                           | HUMAN | 8  |
| 52 | 15.98 | 44.9 | Q9Y6C9 MTCH2 | Mitochondrial carrier homolog 2                              | HUMAN | 9  |
| 53 | 15.9  | 7.8  | P35579 MYH9  | Myosin-9                                                     | HUMAN | 9  |
| 54 | 15.31 | 15.1 | P42166 LAP2A | Lamina-associated polypeptide 2, isoform alpha               | HUMAN | 8  |
| 55 | 15.04 | 8.3  | P07814 SYEP  | Bifunctional glutamate/proline--tRNA ligase                  | HUMAN | 7  |
| 56 | 14.6  | 19.2 | Q92841 DDX17 | Probable ATP-dependent RNA helicase DDX17                    | HUMAN | 7  |
| 57 | 14.43 | 35.2 | P05141 ADT2  | ADP/ATP translocase 2                                        | HUMAN | 11 |
| 58 | 14.4  | 9.2  | P49790 NU153 | Nuclear pore complex protein Nup153                          | HUMAN | 7  |
| 59 | 14.28 | 45.8 | P09601 HMOX1 | Heme oxygenase 1                                             | HUMAN | 9  |
| 60 | 14.22 | 23   | P49411 EFTU  | Elongation factor Tu, mitochondrial                          | HUMAN | 9  |
| 61 | 14.18 | 18.9 | Q96RQ3 MCCA  | Methylcrotonoyl-CoA carboxylase subunit alpha, mitochondrial | HUMAN | 7  |
| 62 | 14    | 15.8 | P38646 GRP75 | Stress-70 protein, mitochondrial                             | HUMAN | 9  |
| 63 | 14    | 14.1 | Q96RP9 EFGM  | Elongation factor G, mitochondrial                           | HUMAN | 7  |
| 64 | 14    | 22   | P36578 RL4   | 60S ribosomal protein L4                                     | HUMAN | 7  |
| 65 | 13.97 | 16.4 | P11142 HSP7C | Heat shock cognate 71 kDa protein                            | HUMAN | 7  |
| 66 | 13.74 | 17.5 | O75844 FACE1 | CAAX prenyl protease 1 homolog                               | HUMAN | 8  |
| 67 | 13.64 | 4.7  | P49792 RBP2  | E3 SUMO-protein ligase RanBP2                                | HUMAN | 8  |
| 68 | 13.55 | 12.7 | P50416 CPT1A | Carnitine O-palmitoyltransferase 1, liver isoform            | HUMAN | 8  |
| 69 | 13.07 | 17.8 | P08670 VIME  | Vimentin                                                     | HUMAN | 7  |
| 70 | 12.53 | 9.4  | P05023 AT1A1 | Sodium/potassium-transporting ATPase subunit alpha-1         | HUMAN | 7  |
| 71 | 12.44 | 13.2 | P54886 P5CS  | Delta-1-pyrroline-5-carboxylate synthase                     | HUMAN | 6  |
| 72 | 12.35 | 21.1 | P07237 PDIA1 | Protein disulfide-isomerase                                  | HUMAN | 7  |
| 73 | 12.28 | 33.7 | P04406 G3P   | Glyceraldehyde-3-phosphate dehydrogenase                     | HUMAN | 7  |
| 74 | 12    | 14.4 | P36776 LONM  | Lon protease homolog, mitochondrial                          | HUMAN | 6  |
| 75 | 12    | 18.4 | P41091 IF2G  | Eukaryotic translation initiation factor 2 subunit 3         | HUMAN | 8  |
| 76 | 12    | 49.1 | P62937 PPIA  | Peptidyl-prolyl cis-trans isomerase A                        | HUMAN | 6  |
| 77 | 12    | 25.3 | Q32P51 RA1L2 | Heterogeneous nuclear ribonucleoprotein A1-like 2            | HUMAN | 6  |
| 78 | 11.94 | 22.5 | Q9H857 NT5D2 | 5'-nucleotidase domain-containing protein 2                  | HUMAN | 6  |
| 79 | 11.9  | 10.1 | O95373 IPO7  | Importin-7                                                   | HUMAN | 7  |
| 80 | 11.64 | 25.6 | P06733 ENOA  | Alpha-enolase                                                | HUMAN | 7  |
| 81 | 11.46 | 17.4 | P78371 TCPB  | T-complex protein 1 subunit beta                             | HUMAN | 6  |
| 82 | 11.45 | 38.7 | Q06830 PRDX1 | Peroxiredoxin-1                                              | HUMAN | 6  |
| 83 | 11.36 | 5.2  | Q12789 TF3C1 | General transcription factor 3C polypeptide 1                | HUMAN | 6  |
| 84 | 10.98 | 13.5 | P28288 ABCD3 | ATP-binding cassette sub-family D member 3                   | HUMAN | 6  |
| 85 | 10.94 | 26.9 | P45880 VDAC2 | Voltage-dependent anion-selective channel protein 2          | HUMAN | 6  |
| 86 | 10.88 | 19.3 | P29401 TKT   | Transketolase                                                | HUMAN | 5  |
| 87 | 10.77 | 5.2  | P46013 KI67  | Proliferation marker protein Ki-67                           | HUMAN | 6  |
| 88 | 10.67 | 16   | Q16881 TRXR1 | Thioredoxin reductase 1, cytoplasmic                         | HUMAN | 5  |
| 89 | 10.64 | 7.3  | O60306 AQR   | Intron-binding protein aquarius                              | HUMAN | 6  |
| 90 | 10.6  | 17.1 | Q00325 MPCP  | Phosphate carrier protein, mitochondrial                     | HUMAN | 7  |
| 91 | 10.28 | 13.5 | P08195 4F2   | 4F2 cell-surface antigen heavy chain                         | HUMAN | 6  |
| 92 | 10.23 | 25.4 | P53701 CCHL  | Cytochrome c-type heme lyase                                 | HUMAN | 6  |
| 93 | 10.09 | 10   | P43304 GPDH  | Glycerol-3-phosphate dehydrogenase, mitochondrial            | HUMAN | 5  |

|     |       |      |              |                                                                                           |       |   |
|-----|-------|------|--------------|-------------------------------------------------------------------------------------------|-------|---|
| 94  | 10.05 | 9.2  | O94901 SUN1  | SUN domain-containing protein 1                                                           | HUMAN | 6 |
| 95  | 10    | 10.2 | P11021 GRP78 | 78 kDa glucose-regulated protein                                                          | HUMAN | 5 |
| 96  | 10    | 14.3 | O43175 SERA  | D-3-phosphoglycerate dehydrogenase                                                        | HUMAN | 5 |
| 97  | 10    | 14.8 | P23526 SAHH  | Adenosylhomocysteinase                                                                    | HUMAN | 5 |
| 98  | 10    | 11.4 | Q00839 HNRPU | Heterogeneous nuclear ribonucleoprotein U                                                 | HUMAN | 8 |
| 99  | 9.82  | 10.4 | P46977 STT3A | Dolichyl-diphosphooligosaccharide--protein glycosyltransferase subunit 3                  | HUMAN | 5 |
| 100 | 9.69  | 13.1 | P30101 PDIA3 | Protein disulfide-isomerase A3                                                            | HUMAN | 5 |
| 101 | 9.61  | 7.8  | P55265 DSRAD | Double-stranded RNA-specific adenosine deaminase                                          | HUMAN | 5 |
| 102 | 9.54  | 9    | O00411 RPOM  | DNA-directed RNA polymerase, mitochondrial                                                | HUMAN | 6 |
| 103 | 9.49  | 2.2  | O75691 UTP20 | Small subunit processome component 20 homolog                                             | HUMAN | 5 |
| 104 | 8.85  | 29.7 | P30048 PRDX3 | Thioredoxin-dependent peroxide reductase, mitochondrial                                   | HUMAN | 6 |
| 105 | 8.67  | 9.9  | Q13200 PSMD2 | 26S proteasome non-ATPase regulatory subunit 2                                            | HUMAN | 4 |
| 106 | 8.49  | 13.4 | Q9H845 ACAD9 | Acyl-CoA dehydrogenase family member 9, mitochondrial                                     | HUMAN | 5 |
| 107 | 8.2   | 5.3  | Q14997 PSME4 | Proteasome activator complex subunit 4                                                    | HUMAN | 4 |
| 108 | 8.16  | 18.7 | Q9H5Q4 TFB2M | Dimethyladenosine transferase 2, mitochondrial                                            | HUMAN | 6 |
| 109 | 8.13  | 16.2 | Q8TB36 GDAP1 | Ganglioside-induced differentiation-associated protein 1                                  | HUMAN | 4 |
| 110 | 8.13  | 50.7 | O14880 MGST3 | Microsomal glutathione S-transferase 3                                                    | HUMAN | 5 |
| 111 | 8.08  | 16   | P00338 LDHA  | L-lactate dehydrogenase A chain                                                           | HUMAN | 4 |
| 112 | 8.06  | 15   | O00571 DDX3X | ATP-dependent RNA helicase DDX3X                                                          | HUMAN | 4 |
| 113 | 8.01  | 6.6  | O43707 ACTN4 | Alpha-actinin-4                                                                           | HUMAN | 4 |
| 114 | 8     | 8.5  | Q12931 TRAP1 | Heat shock protein 75 kDa, mitochondrial                                                  | HUMAN | 5 |
| 115 | 8     | 13.2 | P12268 IMDH2 | Inosine-5'-monophosphate dehydrogenase 2                                                  | HUMAN | 4 |
| 116 | 8     | 24.4 | Q02543 RL18A | 60S ribosomal protein L18a                                                                | HUMAN | 4 |
| 117 | 7.9   | 7.3  | O75694 NU155 | Nuclear pore complex protein Nup155                                                       | HUMAN | 5 |
| 118 | 7.83  | 7.9  | Q01813 PFKAP | ATP-dependent 6-phosphofructokinase, platelet type                                        | HUMAN | 4 |
| 119 | 7.78  | 10.9 | P48643 TCPE  | T-complex protein 1 subunit epsilon                                                       | HUMAN | 4 |
| 120 | 7.68  | 22.1 | P31943 HNRH1 | Heterogeneous nuclear ribonucleoprotein H                                                 | HUMAN | 4 |
| 121 | 7.68  | 3.8  | Q8TEQ6 GEMI5 | Gem-associated protein 5                                                                  | HUMAN | 4 |
| 122 | 7.57  | 13.8 | P60842 IF4A1 | Eukaryotic initiation factor 4A-I                                                         | HUMAN | 4 |
| 123 | 7.31  | 8.3  | P10515 ODP2  | Dihydrolipoyllysine-residue acetyltransferase component of pyruvate dehydrogenase complex | HUMAN | 4 |
| 124 | 7.2   | 13.7 | Q9BZE1 RM37  | 39S ribosomal protein L37, mitochondrial                                                  | HUMAN | 4 |
| 125 | 7.03  | 6.5  | Q15393 SF3B3 | Splicing factor 3B subunit 3                                                              | HUMAN | 3 |
| 126 | 7.01  | 10.3 | P03915 NU5M  | NADH-ubiquinone oxidoreductase chain 5                                                    | HUMAN | 4 |
| 127 | 6.79  | 15   | P07195 LDHB  | L-lactate dehydrogenase B chain                                                           | HUMAN | 4 |
| 128 | 6.59  | 12.5 | P61978 HNRPK | Heterogeneous nuclear ribonucleoprotein K                                                 | HUMAN | 3 |
| 129 | 6.51  | 17.9 | P30041 PRDX6 | Peroxiredoxin-6                                                                           | HUMAN | 4 |
| 130 | 6.49  | 13.4 | Q5TFE4 NT5D1 | 5'-nucleotidase domain-containing protein 1                                               | HUMAN | 4 |
| 131 | 6.46  | 27.7 | P18621 RL17  | 60S ribosomal protein L17                                                                 | HUMAN | 4 |
| 132 | 6.41  | 15   | P13196 HEM1  | 5-aminolevulinic acid synthase, nonspecific, mitochondrial                                | HUMAN | 4 |
| 133 | 6.4   | 11.1 | P31040 SDHA  | Succinate dehydrogenase [ubiquinone] flavoprotein subunit, mitochondrial                  | HUMAN | 3 |
| 134 | 6.39  | 11.8 | Q92552 RT27  | 28S ribosomal protein S27, mitochondrial                                                  | HUMAN | 3 |
| 135 | 6.33  | 13.3 | O14832 PAHX  | Phytanoyl-CoA dioxygenase, peroxisomal                                                    | HUMAN | 4 |
| 136 | 6.33  | 3.4  | Q93008 USP9X | Probable ubiquitin carboxyl-terminal hydrolase FAF-X                                      | HUMAN | 4 |
| 137 | 6.24  | 14.1 | Q9H7Z7 PGES2 | Prostaglandin E synthase 2                                                                | HUMAN | 4 |
| 138 | 6.23  | 14.7 | O75616 ERAL1 | GTPase Era, mitochondrial                                                                 | HUMAN | 3 |
| 139 | 6.08  | 20.6 | P04075 ALDOA | Fructose-bisphosphate aldolase A                                                          | HUMAN | 3 |
| 140 | 6.06  | 12.8 | P26641 EF1G  | Elongation factor 1-gamma                                                                 | HUMAN | 3 |
| 141 | 6.05  | 4.9  | Q86VP6 CAND1 | Cullin-associated NEDD8-dissociated protein 1                                             | HUMAN | 3 |
| 142 | 6.05  | 19.4 | Q9Y277 VDAC3 | Voltage-dependent anion-selective channel protein 3                                       | HUMAN | 3 |
| 143 | 6.04  | 5.2  | P56192 SYMC  | Methionine--tRNA ligase, cytoplasmic                                                      | HUMAN | 3 |

|     |      |      |              |                                                               |       |    |
|-----|------|------|--------------|---------------------------------------------------------------|-------|----|
| 144 | 6.03 | 17.4 | Q07021 C1QBP | Complement component 1 Q subcomponent-binding protein, mitoch | HUMAN | 3  |
| 145 | 6.02 | 14.1 | Q9Y2S7 PDIP2 | Polymerase delta-interacting protein 2                        | HUMAN | 3  |
| 146 | 6    | 44.5 | O43169 CYB5B | Cytochrome b5 type B                                          | HUMAN | 5  |
| 147 | 6    | 6.8  | P05091 ALDH2 | Aldehyde dehydrogenase, mitochondrial                         | HUMAN | 3  |
| 148 | 6    | 6.4  | P53985 MOT1  | Monocarboxylate transporter 1                                 | HUMAN | 3  |
| 149 | 6    | 15.7 | P62753 RS6   | 40S ribosomal protein S6                                      | HUMAN | 3  |
| 150 | 6    | 67.4 | P68371 TBB4B | Tubulin beta-4B chain                                         | HUMAN | 28 |
| 151 | 6    | 31.4 | P07737 PROF1 | Profilin-1                                                    | HUMAN | 3  |
| 152 | 6    | 16.2 | P61313 RL15  | 60S ribosomal protein L15                                     | HUMAN | 3  |
| 153 | 6    | 8.9  | Q15084 PDIA6 | Protein disulfide-isomerase A6                                | HUMAN | 3  |
| 154 | 5.96 | 6.4  | P42892 ECE1  | Endothelin-converting enzyme 1                                | HUMAN | 3  |
| 155 | 5.91 | 8.3  | Q14974 IMB1  | Importin subunit beta-1                                       | HUMAN | 4  |
| 156 | 5.89 | 4.2  | Q5ST30 SYVM  | Valine--tRNA ligase, mitochondrial                            | HUMAN | 3  |
| 157 | 5.86 | 3.9  | Q14980 NUMA1 | Nuclear mitotic apparatus protein 1                           | HUMAN | 3  |
| 158 | 5.85 | 7    | Q13838 DX39B | Spliceosome RNA helicase DDX39B                               | HUMAN | 3  |
| 159 | 5.81 | 11.7 | P49368 TCPG  | T-complex protein 1 subunit gamma                             | HUMAN | 3  |
| 160 | 5.6  | 5.5  | Q9UHI6 DDX20 | Probable ATP-dependent RNA helicase DDX20                     | HUMAN | 3  |
| 161 | 5.59 | 9.3  | Q9BT22 ALG1  | Chitobiosyldiphosphodolichol beta-mannosyltransferase         | HUMAN | 3  |
| 162 | 5.55 | 7    | Q16822 PCKGM | Phosphoenolpyruvate carboxykinase [GTP], mitochondrial        | HUMAN | 3  |
| 163 | 5.46 | 9.1  | Q16850 CP51A | Lanosterol 14-alpha demethylase                               | HUMAN | 3  |
| 164 | 5.39 | 28.5 | P27635 RL10  | 60S ribosomal protein L10                                     | HUMAN | 6  |
| 165 | 5.37 | 22.3 | P46776 RL27A | 60S ribosomal protein L27a                                    | HUMAN | 3  |
| 166 | 5.28 | 7    | P06576 ATPB  | ATP synthase subunit beta, mitochondrial                      | HUMAN | 3  |
| 167 | 5.25 | 8.8  | P14625 ENPL  | Endoplasmic                                                   | HUMAN | 4  |
| 168 | 5.24 | 11.9 | P31930 QCR1  | Cytochrome b-c1 complex subunit 1, mitochondrial              | HUMAN | 3  |
| 169 | 5.18 | 12.8 | P36542 ATPG  | ATP synthase subunit gamma, mitochondrial                     | HUMAN | 3  |
| 170 | 5.13 | 13.1 | P51398 RT29  | 28S ribosomal protein S29, mitochondrial                      | HUMAN | 4  |
| 171 | 5.11 | 12.6 | P14866 HNRPL | Heterogeneous nuclear ribonucleoprotein L                     | HUMAN | 3  |
| 172 | 5.07 | 3.3  | Q9NQC3 RTN4  | Reticulon-4                                                   | HUMAN | 3  |
| 173 | 5.02 | 18.3 | P07355 ANXA2 | Annexin A2                                                    | HUMAN | 3  |
| 174 | 4.98 | 2    | O95714 HERC2 | E3 ubiquitin-protein ligase HERC2                             | HUMAN | 3  |
| 175 | 4.89 | 4.5  | P11388 TOP2A | DNA topoisomerase 2-alpha                                     | HUMAN | 3  |
| 176 | 4.85 | 38.1 | Q71UM5 RS27L | 40S ribosomal protein S27-like                                | HUMAN | 3  |
| 177 | 4.81 | 11   | P21796 VDAC1 | Voltage-dependent anion-selective channel protein 1           | HUMAN | 3  |
| 178 | 4.62 | 34.8 | Q9BUF5 TBB6  | Tubulin beta-6 chain                                          | HUMAN | 15 |
| 179 | 4.57 | 7.5  | Q9UHG3 PCYOX | Prenylcysteine oxidase 1                                      | HUMAN | 3  |
| 180 | 4.56 | 16.5 | Q99714 HCD2  | 3-hydroxyacyl-CoA dehydrogenase type-2                        | HUMAN | 2  |
| 181 | 4.53 | 7.5  | Q16891 MIC60 | MICOS complex subunit MIC60                                   | HUMAN | 3  |
| 182 | 4.5  | 15.3 | Q8TED1 GPX8  | Probable glutathione peroxidase 8                             | HUMAN | 3  |
| 183 | 4.46 | 5.3  | Q9BW92 SYTM  | Threonine--tRNA ligase, mitochondrial                         | HUMAN | 3  |
| 184 | 4.46 | 34.3 | P23528 COF1  | Cofilin-1                                                     | HUMAN | 2  |
| 185 | 4.4  | 18   | Q8NHW5 RLA0L | 60S acidic ribosomal protein P0-like                          | HUMAN | 2  |
| 186 | 4.38 | 12.6 | P08574 CY1   | Cytochrome c1, heme protein, mitochondrial                    | HUMAN | 3  |
| 187 | 4.37 | 13.5 | Q9NX40 OCAD1 | OCIA domain-containing protein 1                              | HUMAN | 3  |
| 188 | 4.35 | 1.4  | Q9Y4A5 TRRAP | Transformation/transcription domain-associated protein        | HUMAN | 2  |
| 189 | 4.34 | 7.6  | Q13310 PABP4 | Polyadenylate-binding protein 4                               | HUMAN | 2  |
| 190 | 4.3  | 5.3  | Q9BUJ2 HNRL1 | Heterogeneous nuclear ribonucleoprotein U-like protein 1      | HUMAN | 2  |
| 191 | 4.27 | 15.9 | P52597 HNRPF | Heterogeneous nuclear ribonucleoprotein F                     | HUMAN | 4  |
| 192 | 4.22 | 15   | Q9UMS0 NFU1  | NFU1 iron-sulfur cluster scaffold homolog, mitochondrial      | HUMAN | 2  |
| 193 | 4.16 | 30.5 | P63241 IF5A1 | Eukaryotic translation initiation factor 5A-1                 | HUMAN | 2  |

|     |      |      |              |                                                                  |       |    |
|-----|------|------|--------------|------------------------------------------------------------------|-------|----|
| 194 | 4.14 | 14.8 | P17844 DDX5  | Probable ATP-dependent RNA helicase DDX5                         | HUMAN | 4  |
| 195 | 4.13 | 9.6  | P55072 TERA  | Transitional endoplasmic reticulum ATPase                        | HUMAN | 3  |
| 196 | 4.11 | 2.1  | Q8N3C0 ASCC3 | Activating signal cointegrator 1 complex subunit 3               | HUMAN | 2  |
| 197 | 4.1  | 8.8  | Q6PIU2 NCEH1 | Neutral cholesterol ester hydrolase 1                            | HUMAN | 2  |
| 198 | 4.08 | 15.1 | P08559 ODPA  | Pyruvate dehydrogenase E1 component subunit alpha, somatic form, | HUMAN | 3  |
| 199 | 4.08 | 7.6  | Q14566 MCM6  | DNA replication licensing factor MCM6                            | HUMAN | 3  |
| 200 | 4.07 | 7.5  | P26639 SYTC  | Threonine--tRNA ligase, cytoplasmic                              | HUMAN | 2  |
| 201 | 4.02 | 6.5  | Q9P258 RCC2  | Protein RCC2                                                     | HUMAN | 2  |
| 202 | 4.01 | 7.2  | P00367 DHE3  | Glutamate dehydrogenase 1, mitochondrial                         | HUMAN | 2  |
| 203 | 4.01 | 6.2  | Q96920 TBRG4 | Protein TBRG4                                                    | HUMAN | 2  |
| 204 | 4.01 | 13.9 | P46781 RS9   | 40S ribosomal protein S9                                         | HUMAN | 2  |
| 205 | 4    | 22.9 | P10599 THIO  | Thioredoxin                                                      | HUMAN | 2  |
| 206 | 4    | 9.1  | P32322 P5CR1 | Pyrroline-5-carboxylate reductase 1, mitochondrial               | HUMAN | 2  |
| 207 | 4    | 4.4  | P34932 HSP74 | Heat shock 70 kDa protein 4                                      | HUMAN | 2  |
| 208 | 4    | 3.1  | Q12906 ILF3  | Interleukin enhancer-binding factor 3                            | HUMAN | 2  |
| 209 | 4    | 4.1  | Q5JRX3 PREP  | Presequence protease, mitochondrial                              | HUMAN | 2  |
| 210 | 4    | 44.8 | Q96IX5 USMG5 | Up-regulated during skeletal muscle growth protein 5             | HUMAN | 2  |
| 211 | 4    | 1.5  | Q9H583 HEAT1 | HEAT repeat-containing protein 1                                 | HUMAN | 2  |
| 212 | 4    | 15.3 | O15258 RER1  | Protein RER1                                                     | HUMAN | 2  |
| 213 | 4    | 2.2  | O95197 RTN3  | Reticulon-3                                                      | HUMAN | 2  |
| 214 | 4    | 33.7 | P04080 CYTB  | Cystatin-B                                                       | HUMAN | 2  |
| 215 | 4    | 12.7 | P04792 HSPB1 | Heat shock protein beta-1                                        | HUMAN | 2  |
| 216 | 4    | 10.7 | P21266 GSTM3 | Glutathione S-transferase Mu 3                                   | HUMAN | 2  |
| 217 | 4    | 11.3 | P40429 RL13A | 60S ribosomal protein L13a                                       | HUMAN | 2  |
| 218 | 4    | 5.2  | P43243 MATR3 | Matrin-3                                                         | HUMAN | 2  |
| 219 | 4    | 9.8  | P46777 RL5   | 60S ribosomal protein L5                                         | HUMAN | 2  |
| 220 | 4    | 12.9 | P62913 RL11  | 60S ribosomal protein L11                                        | HUMAN | 2  |
| 221 | 4    | 32.9 | P63173 RL38  | 60S ribosomal protein L38                                        | HUMAN | 2  |
| 222 | 4    | 28.2 | P69905 HBA   | Hemoglobin subunit alpha                                         | HUMAN | 2  |
| 223 | 4    | 9.2  | P84098 RL19  | 60S ribosomal protein L19                                        | HUMAN | 2  |
| 224 | 4    | 13.8 | Q07020 RL18  | 60S ribosomal protein L18                                        | HUMAN | 2  |
| 225 | 4    | 15.9 | Q15366 PCBP2 | Poly(rC)-binding protein 2                                       | HUMAN | 4  |
| 226 | 4    | 6.1  | Q16658 FSCN1 | Fascin                                                           | HUMAN | 2  |
| 227 | 4    | 15.9 | Q6UW68 TM205 | Transmembrane protein 205                                        | HUMAN | 2  |
| 228 | 4    | 48.6 | Q9BQE3 TBA1C | Tubulin alpha-1C chain                                           | HUMAN | 17 |
| 229 | 4    | 3.2  | Q9NZB2 F120A | Constitutive coactivator of PPAR-gamma-like protein 1            | HUMAN | 2  |
| 230 | 3.96 | 3.7  | Q03518 TAP1  | Antigen peptide transporter 1                                    | HUMAN | 2  |
| 231 | 3.96 | 3.7  | Q16678 CP1B1 | Cytochrome P450 1B1                                              | HUMAN | 2  |
| 232 | 3.96 | 5.6  | Q96GW9 SYMM  | Methionine--tRNA ligase, mitochondrial                           | HUMAN | 2  |
| 233 | 3.93 | 4    | Q02218 ODO1  | 2-oxoglutarate dehydrogenase, mitochondrial                      | HUMAN | 2  |
| 234 | 3.92 | 4.6  | Q92685 ALG3  | Dol-P-Man:Man(5)GlcNAc(2)-PP-Dol alpha-1,3-mannosyltransferase   | HUMAN | 2  |
| 235 | 3.9  | 5.9  | Q99832 TCPH  | T-complex protein 1 subunit eta                                  | HUMAN | 2  |
| 236 | 3.89 | 9.4  | Q9NYP7 ELOV5 | Elongation of very long chain fatty acids protein 5              | HUMAN | 2  |
| 237 | 3.85 | 20.3 | Q5RI15 COX20 | Cytochrome c oxidase protein 20 homolog                          | HUMAN | 2  |
| 238 | 3.84 | 25.7 | P15531 NDKA  | Nucleoside diphosphate kinase A                                  | HUMAN | 3  |
| 239 | 3.74 | 17.4 | P25398 RS12  | 40S ribosomal protein S12                                        | HUMAN | 3  |
| 240 | 3.73 | 7.5  | Q9NSE4 SYIM  | Isoleucine--tRNA ligase, mitochondrial                           | HUMAN | 2  |
| 241 | 3.66 | 13.7 | P47756 CAPZB | F-actin-capping protein subunit beta                             | HUMAN | 2  |
| 242 | 3.64 | 14.6 | P60900 PSA6  | Proteasome subunit alpha type-6                                  | HUMAN | 2  |
| 243 | 3.6  | 11.6 | P22626 ROA2  | Heterogeneous nuclear ribonucleoproteins A2/B1                   | HUMAN | 3  |

|     |      |      |              |                                                               |       |   |
|-----|------|------|--------------|---------------------------------------------------------------|-------|---|
| 244 | 3.6  | 3.1  | Q9BQG0 MBB1A | Myb-binding protein 1A                                        | HUMAN | 2 |
| 245 | 3.55 | 6.6  | P52292 IMA1  | Importin subunit alpha-1                                      | HUMAN | 3 |
| 246 | 3.5  | 8.4  | O14980 XPO1  | Exportin-1                                                    | HUMAN | 2 |
| 247 | 3.48 | 4.4  | P55084 ECHB  | Trifunctional enzyme subunit beta, mitochondrial              | HUMAN | 2 |
| 248 | 3.44 | 4.5  | O75027 ABCB7 | ATP-binding cassette sub-family B member 7, mitochondrial     | HUMAN | 2 |
| 249 | 3.42 | 1.5  | P35573 GDE   | Glycogen debranching enzyme                                   | HUMAN | 2 |
| 250 | 3.38 | 15   | Q86YH6 DLP1  | Decaprenyl-diphosphate synthase subunit 2                     | HUMAN | 2 |
| 251 | 3.34 | 2.3  | A5YKK6 CNOT1 | CCR4-NOT transcription complex subunit 1                      | HUMAN | 2 |
| 252 | 3.28 | 5.8  | Q7KZF4 SND1  | Staphylococcal nuclease domain-containing protein 1           | HUMAN | 2 |
| 253 | 3.27 | 10.3 | P09001 RM03  | 39S ribosomal protein L3, mitochondrial                       | HUMAN | 2 |
| 254 | 3.21 | 13.3 | Q9H2D1 MFTC  | Mitochondrial folate transporter/carrier                      | HUMAN | 2 |
| 255 | 3.19 | 51.3 | P62888 RL30  | 60S ribosomal protein L30                                     | HUMAN | 2 |
| 256 | 3.17 | 3.1  | Q92598 HS105 | Heat shock protein 105 kDa                                    | HUMAN | 2 |
| 257 | 3.13 | 4.1  | P31948 STIP1 | Stress-induced-phosphoprotein 1                               | HUMAN | 2 |
| 258 | 3.12 | 14.4 | P62341 SELT  | Selenoprotein T                                               | HUMAN | 2 |
| 259 | 3.1  | 0.8  | Q9NU22 MDN1  | Midasin                                                       | HUMAN | 2 |
| 260 | 3.09 | 6.2  | Q3ZCQ8 TIM50 | Mitochondrial import inner membrane translocase subunit TIM50 | HUMAN | 2 |
| 261 | 3.08 | 4.9  | P07339 CATD  | Cathepsin D                                                   | HUMAN | 2 |
| 262 | 3.08 | 12.9 | Q02878 RL6   | 60S ribosomal protein L6                                      | HUMAN | 3 |
| 263 | 3.07 | 3.9  | O15091 MRRP3 | Mitochondrial ribonuclease P protein 3                        | HUMAN | 2 |
| 264 | 3.05 | 4.9  | Q16576 RBBP7 | Histone-binding protein RBBP7                                 | HUMAN | 2 |
| 265 | 3.04 | 5.1  | P09874 PARP1 | Poly [ADP-ribose] polymerase 1                                | HUMAN | 2 |
| 266 | 3.04 | 7.6  | P25705 ATPA  | ATP synthase subunit alpha, mitochondrial                     | HUMAN | 2 |
| 267 | 3.04 | 6.4  | P53007 TXTP  | Tricarboxylate transport protein, mitochondrial               | HUMAN | 2 |
| 268 | 3.01 | 4.3  | P30876 RPB2  | DNA-directed RNA polymerase II subunit RPB2                   | HUMAN | 2 |
| 269 | 2.97 | 10.2 | P08243 ASNS  | Asparagine synthetase [glutamine-hydrolyzing]                 | HUMAN | 2 |
| 270 | 2.97 | 7.2  | Q9H7H0 MET17 | Methyltransferase-like protein 17, mitochondrial              | HUMAN | 2 |
| 271 | 2.97 | 4    | O43143 DHX15 | Pre-mRNA-splicing factor ATP-dependent RNA helicase DHX15     | HUMAN | 1 |
| 272 | 2.96 | 5.8  | P00505 AATM  | Aspartate aminotransferase, mitochondrial                     | HUMAN | 2 |
| 273 | 2.95 | 11.1 | P42765 THIM  | 3-ketoacyl-CoA thiolase, mitochondrial                        | HUMAN | 2 |
| 274 | 2.93 | 2.4  | P11586 C1TC  | C-1-tetrahydrofolate synthase, cytoplasmic                    | HUMAN | 2 |
| 275 | 2.93 | 6.9  | Q9BXW7 CECR5 | Cat eye syndrome critical region protein 5                    | HUMAN | 2 |
| 276 | 2.89 | 19.1 | P83731 RL24  | 60S ribosomal protein L24                                     | HUMAN | 2 |
| 277 | 2.89 | 4.5  | P13010 XRCC5 | X-ray repair cross-complementing protein 5                    | HUMAN | 2 |
| 278 | 2.89 | 1.7  | Q14643 ITPR1 | Inositol 1,4,5-trisphosphate receptor type 1                  | HUMAN | 1 |
| 279 | 2.87 | 3.3  | P22314 UBA1  | Ubiquitin-like modifier-activating enzyme 1                   | HUMAN | 2 |
| 280 | 2.79 | 5.1  | P17812 PYRG1 | CTP synthase 1                                                | HUMAN | 2 |
| 281 | 2.78 | 7.2  | P55209 NP1L1 | Nucleosome assembly protein 1-like 1                          | HUMAN | 2 |
| 282 | 2.76 | 24.6 | P62244 RS15A | 40S ribosomal protein S15a                                    | HUMAN | 1 |
| 283 | 2.62 | 0.9  | Q7Z6Z7 HUWE1 | E3 ubiquitin-protein ligase HUWE1                             | HUMAN | 1 |
| 284 | 2.61 | 6.9  | P50991 TCPD  | T-complex protein 1 subunit delta                             | HUMAN | 2 |
| 285 | 2.59 | 8.2  | Q9NZJ7 MTCH1 | Mitochondrial carrier homolog 1                               | HUMAN | 1 |
| 286 | 2.59 | 2.1  | P52701 MSH6  | DNA mismatch repair protein Msh6                              | HUMAN | 1 |
| 287 | 2.56 | 7.4  | P17987 TCPA  | T-complex protein 1 subunit alpha                             | HUMAN | 2 |
| 288 | 2.52 | 7.7  | Q96SZ6 CK5P1 | CDK5 regulatory subunit-associated protein 1                  | HUMAN | 1 |
| 289 | 2.48 | 6    | P40227 TCPZ  | T-complex protein 1 subunit zeta                              | HUMAN | 2 |
| 290 | 2.48 | 4.4  | Q93009 UBP7  | Ubiquitin carboxyl-terminal hydrolase 7                       | HUMAN | 1 |
| 291 | 2.48 | 3.7  | Q96I24 FUBP3 | Far upstream element-binding protein 3                        | HUMAN | 2 |
| 292 | 2.45 | 8.7  | P0DMV9 HS71B | Heat shock 70 kDa protein 1B                                  | HUMAN | 3 |
| 293 | 2.43 | 2.7  | Q9HAV4 XPO5  | Exportin-5                                                    | HUMAN | 1 |

|     |      |      |               |                                                                    |       |    |
|-----|------|------|---------------|--------------------------------------------------------------------|-------|----|
| 294 | 2.42 | 4.6  | Q9H0A0 NAT10  | RNA cytidine acetyltransferase                                     | HUMAN | 1  |
| 295 | 2.41 | 4    | Q13263 TIF1B  | Transcription intermediary factor 1-beta                           | HUMAN | 1  |
| 296 | 2.36 | 7.6  | Q99536 VAT1   | Synaptic vesicle membrane protein VAT-1 homolog                    | HUMAN | 2  |
| 297 | 2.33 | 2.7  | P27816 MAP4   | Microtubule-associated protein 4                                   | HUMAN | 2  |
| 298 | 2.31 | 4.4  | Q8NBS9 TXND5  | Thioredoxin domain-containing protein 5                            | HUMAN | 1  |
| 299 | 2.3  | 5.4  | Q5JTH9 RRP12  | RRP12-like protein                                                 | HUMAN | 1  |
| 300 | 2.29 | 7.5  | P52272 HNRPM  | Heterogeneous nuclear ribonucleoprotein M                          | HUMAN | 1  |
| 301 | 2.29 | 1.5  | Q9ULT8 HECD1  | E3 ubiquitin-protein ligase HECTD1                                 | HUMAN | 1  |
| 302 | 2.28 | 4.7  | Q96TA2 YME1L1 | ATP-dependent zinc metalloprotease YME1L1                          | HUMAN | 1  |
| 303 | 2.28 | 4.4  | O15371 EIF3D  | Eukaryotic translation initiation factor 3 subunit D               | HUMAN | 1  |
| 304 | 2.26 | 7.5  | Q96AG4 LRC59  | Leucine-rich repeat-containing protein 59                          | HUMAN | 1  |
| 305 | 2.26 | 3.9  | Q96EY7 PTCD3  | Pentatricopeptide repeat domain-containing protein 3, mitochondria | HUMAN | 1  |
| 306 | 2.23 | 7    | Q9ULV4 COR1C  | Coronin-1C                                                         | HUMAN | 1  |
| 307 | 2.15 | 5    | Q9Y305 ACOT9  | Acyl-coenzyme A thioesterase 9, mitochondrial                      | HUMAN | 1  |
| 308 | 2.14 | 4.6  | Q99797 MIPEP  | Mitochondrial intermediate peptidase                               | HUMAN | 1  |
| 309 | 2.13 | 8.1  | P28331 NDUS1  | NADH-ubiquinone oxidoreductase 75 kDa subunit, mitochondrial       | HUMAN | 1  |
| 310 | 2.12 | 13   | P62249 RS16   | 40S ribosomal protein S16                                          | HUMAN | 2  |
| 311 | 2.09 | 7.1  | P08754 GNAI3  | Guanine nucleotide-binding protein G(k) subunit alpha              | HUMAN | 1  |
| 312 | 2.09 | 10.2 | P09493 TPM1   | Tropomyosin alpha-1 chain                                          | HUMAN | 1  |
| 313 | 2.07 | 9.7  | P62826 RAN    | GTP-binding nuclear protein Ran                                    | HUMAN | 1  |
| 314 | 2.07 | 4.2  | P35610 SOAT1  | Sterol O-acyltransferase 1                                         | HUMAN | 1  |
| 315 | 2.06 | 4.8  | O60506 HNRPQ  | Heterogeneous nuclear ribonucleoprotein Q                          | HUMAN | 1  |
| 316 | 2.05 | 4    | P13667 PDIA4  | Protein disulfide-isomerase A4                                     | HUMAN | 1  |
| 317 | 2.03 | 21.9 | P62987 RL40   | Ubiquitin-60S ribosomal protein L40                                | HUMAN | 2  |
| 318 | 2.02 | 10.2 | P24539 AT5F1  | ATP synthase F(0) complex subunit B1, mitochondrial                | HUMAN | 2  |
| 319 | 2.02 | 4.3  | P47897 SYQ    | Glutamine--tRNA ligase                                             | HUMAN | 1  |
| 320 | 2.02 | 27   | Q14061 COX17  | Cytochrome c oxidase copper chaperone                              | HUMAN | 3  |
| 321 | 2.02 | 2.8  | O94906 PRP6   | Pre-mRNA-processing factor 6                                       | HUMAN | 1  |
| 322 | 2.02 | 4.5  | Q15392 DHC24  | Delta(24)-sterol reductase                                         | HUMAN | 1  |
| 323 | 2.02 | 3.4  | Q9BSJ5 CQ080  | Uncharacterized protein C17orf80                                   | HUMAN | 1  |
| 324 | 2    | 4.2  | O00170 AIP    | AH receptor-interacting protein                                    | HUMAN | 1  |
| 325 | 2    | 4.3  | O00217 NDUS8  | NADH dehydrogenase [ubiquinone] iron-sulfur protein 8, mitochondr  | HUMAN | 1  |
| 326 | 2    | 12.4 | O00483 NDUA4  | Cytochrome c oxidase subunit NDUF4                                 | HUMAN | 1  |
| 327 | 2    | 4.3  | O75439 MPPB   | Mitochondrial-processing peptidase subunit beta                    | HUMAN | 1  |
| 328 | 2    | 3.3  | O75600 KBL    | 2-amino-3-ketobutyrate coenzyme A ligase, mitochondrial            | HUMAN | 1  |
| 329 | 2    | 6.1  | O75608 LYPA1  | Acyl-protein thioesterase 1                                        | HUMAN | 1  |
| 330 | 2    | 3.1  | O94925 GLSK   | Glutaminase kidney isoform, mitochondrial                          | HUMAN | 1  |
| 331 | 2    | 6.9  | P12081 SYHC   | Histidine--tRNA ligase, cytoplasmic                                | HUMAN | 1  |
| 332 | 2    | 4.5  | P18754 RCC1   | Regulator of chromosome condensation                               | HUMAN | 1  |
| 333 | 2    | 3.1  | P19367 HXK1   | Hexokinase-1                                                       | HUMAN | 1  |
| 334 | 2    | 2    | P27824 CALX   | Calnexin                                                           | HUMAN | 1  |
| 335 | 2    | 2.7  | P30837 AL1B1  | Aldehyde dehydrogenase X, mitochondrial                            | HUMAN | 1  |
| 336 | 2    | 3    | P41250 SYG    | Glycine--tRNA ligase                                               | HUMAN | 1  |
| 337 | 2    | 4.5  | P49821 NDUV1  | NADH dehydrogenase [ubiquinone] flavoprotein 1, mitochondrial      | HUMAN | 1  |
| 338 | 2    | 4.6  | P53597 SUCA   | Succinate--CoA ligase [ADP/GDP-forming] subunit alpha, mitochondri | HUMAN | 1  |
| 339 | 2    | 13.7 | P61604 CH10   | 10 kDa heat shock protein, mitochondrial                           | HUMAN | 1  |
| 340 | 2    | 8.6  | P62263 RS14   | 40S ribosomal protein S14                                          | HUMAN | 1  |
| 341 | 2    | 24.7 | P63167 DYL1   | Dynein light chain 1, cytoplasmic                                  | HUMAN | 1  |
| 342 | 2    | 41.1 | P68366 TBA4A  | Tubulin alpha-4A chain                                             | HUMAN | 15 |
| 343 | 2    | 1.4  | Q08J23 NSUN2  | tRNA (cytosine(34)-C(5))-methyltransferase                         | HUMAN | 1  |

|     |   |      |              |                                                                   |       |   |
|-----|---|------|--------------|-------------------------------------------------------------------|-------|---|
| 344 | 2 | 1.2  | Q13423 NNTM  | NAD(P) transhydrogenase, mitochondrial                            | HUMAN | 1 |
| 345 | 2 | 2.7  | Q3SXM5 HSDL1 | Inactive hydroxysteroid dehydrogenase-like protein 1              | HUMAN | 1 |
| 346 | 2 | 5.8  | Q567V2 M17L2 | Mpv17-like protein 2                                              | HUMAN | 1 |
| 347 | 2 | 2.6  | Q7Z434 MAVS  | Mitochondrial antiviral-signaling protein                         | HUMAN | 1 |
| 348 | 2 | 16.9 | Q8N4Q1 MIA40 | Mitochondrial intermembrane space import and assembly protein 40  | HUMAN | 1 |
| 349 | 2 | 6    | Q96TC7 RMD3  | Regulator of microtubule dynamics protein 3                       | HUMAN | 1 |
| 350 | 2 | 7.4  | Q9BYC9 RM20  | 39S ribosomal protein L20, mitochondrial                          | HUMAN | 1 |
| 351 | 2 | 3.5  | Q9NP81 SYSM  | Serine--tRNA ligase, mitochondrial                                | HUMAN | 1 |
| 352 | 2 | 2.6  | Q9NVV4 PAPD1 | Poly(A) RNA polymerase, mitochondrial                             | HUMAN | 1 |
| 353 | 2 | 3.9  | Q9P035 HACD3 | Very-long-chain (3R)-3-hydroxyacyl-CoA dehydratase 3              | HUMAN | 1 |
| 354 | 2 | 3.1  | O00541 PESC  | Pescadillo homolog                                                | HUMAN | 1 |
| 355 | 2 | 4.6  | O14828 SCAM3 | Secretory carrier-associated membrane protein 3                   | HUMAN | 1 |
| 356 | 2 | 4.8  | O15260 SURF4 | Surfeit locus protein 4                                           | HUMAN | 1 |
| 357 | 2 | 6.2  | O60831 PRAF2 | PRA1 family protein 2                                             | HUMAN | 1 |
| 358 | 2 | 2.2  | O94919 ENDD1 | Endonuclease domain-containing 1 protein                          | HUMAN | 1 |
| 359 | 2 | 2.4  | P00734 THRB  | Prothrombin                                                       | HUMAN | 1 |
| 360 | 2 | 0.2  | P04114 APOB  | Apolipoprotein B-100                                              | HUMAN | 1 |
| 361 | 2 | 3.6  | P07910 HNRPC | Heterogeneous nuclear ribonucleoproteins C1/C2                    | HUMAN | 1 |
| 362 | 2 | 8.1  | P08708 RS17  | 40S ribosomal protein S17                                         | HUMAN | 1 |
| 363 | 2 | 3.8  | P15880 RS2   | 40S ribosomal protein S2                                          | HUMAN | 1 |
| 364 | 2 | 0.8  | P21359 NF1   | Neurofibromin                                                     | HUMAN | 1 |
| 365 | 2 | 4.3  | P26373 RL13  | 60S ribosomal protein L13                                         | HUMAN | 1 |
| 366 | 2 | 8.5  | P29692 EF1D  | Elongation factor 1-delta                                         | HUMAN | 1 |
| 367 | 2 | 9.1  | P30050 RL12  | 60S ribosomal protein L12                                         | HUMAN | 1 |
| 368 | 2 | 10.2 | P35268 RL22  | 60S ribosomal protein L22                                         | HUMAN | 1 |
| 369 | 2 | 9.4  | P46778 RL21  | 60S ribosomal protein L21                                         | HUMAN | 1 |
| 370 | 2 | 2.7  | P48651 PTSS1 | Phosphatidylserine synthase 1                                     | HUMAN | 1 |
| 371 | 2 | 6.3  | P50395 GDIB  | Rab GDP dissociation inhibitor beta                               | HUMAN | 1 |
| 372 | 2 | 5.6  | P50914 RL14  | 60S ribosomal protein L14                                         | HUMAN | 1 |
| 373 | 2 | 12.7 | P55795 HNRH2 | Heterogeneous nuclear ribonucleoprotein H2                        | HUMAN | 3 |
| 374 | 2 | 4.9  | P57088 TMM33 | Transmembrane protein 33                                          | HUMAN | 1 |
| 375 | 2 | 5.3  | P60891 PRPS1 | Ribose-phosphate pyrophosphokinase 1                              | HUMAN | 1 |
| 376 | 2 | 5.3  | P61158 ARP3  | Actin-related protein 3                                           | HUMAN | 1 |
| 377 | 2 | 7.7  | P62266 RS23  | 40S ribosomal protein S23                                         | HUMAN | 1 |
| 378 | 2 | 13   | P62854 RS26  | 40S ribosomal protein S26                                         | HUMAN | 1 |
| 379 | 2 | 15.7 | P68871 HBB   | Hemoglobin subunit beta                                           | HUMAN | 1 |
| 380 | 2 | 12.1 | Q01629 IFM2  | Interferon-induced transmembrane protein 2                        | HUMAN | 2 |
| 381 | 2 | 3.6  | Q01650 LAT1  | Large neutral amino acids transporter small subunit 1             | HUMAN | 1 |
| 382 | 2 | 1.9  | Q10471 GALT2 | Polypeptide N-acetylgalactosaminyltransferase 2                   | HUMAN | 1 |
| 383 | 2 | 8.3  | Q10589 BST2  | Bone marrow stromal antigen 2                                     | HUMAN | 1 |
| 384 | 2 | 2.6  | Q12905 ILF2  | Interleukin enhancer-binding factor 2                             | HUMAN | 1 |
| 385 | 2 | 2.8  | Q14684 RRP1B | Ribosomal RNA processing protein 1 homolog B                      | HUMAN | 1 |
| 386 | 2 | 2    | Q5SNT2 TM201 | Transmembrane protein 201                                         | HUMAN | 1 |
| 387 | 2 | 3    | Q6NUM9 RETST | All-trans-retinol 13,14-reductase                                 | HUMAN | 1 |
| 388 | 2 | 5.4  | Q6NUT3 MFS12 | Major facilitator superfamily domain-containing protein 12        | HUMAN | 1 |
| 389 | 2 | 1.4  | Q7Z2K6 ERMP1 | Endoplasmic reticulum metallopeptidase 1                          | HUMAN | 1 |
| 390 | 2 | 1.8  | Q8IYD1 ERF3B | Eukaryotic peptide chain release factor GTP-binding subunit ERF3B | HUMAN | 1 |
| 391 | 2 | 2.3  | Q8IZV5 RDH10 | Retinol dehydrogenase 10                                          | HUMAN | 1 |
| 392 | 2 | 3.6  | Q8NFJ5 RAI3  | Retinoic acid-induced protein 3                                   | HUMAN | 1 |
| 393 | 2 | 2.2  | Q8WTV0 SCRB1 | Scavenger receptor class B member 1                               | HUMAN | 1 |



|     |      |                   |                                                                   |       |   |
|-----|------|-------------------|-------------------------------------------------------------------|-------|---|
| 394 | 2    | 2.5 Q92769 HDAC2  | Histone deacetylase 2                                             | HUMAN | 1 |
| 395 | 2    | 9.9 Q96AX2 RAB37  | Ras-related protein Rab-37                                        | HUMAN | 1 |
| 396 | 2    | 3.6 Q96N66 MBOA7  | Lysophospholipid acyltransferase 7                                | HUMAN | 1 |
| 397 | 2    | 3 Q99729 ROAA     | Heterogeneous nuclear ribonucleoprotein A/B                       | HUMAN | 1 |
| 398 | 2    | 3.3 Q9BWF3 RBM4   | RNA-binding protein 4                                             | HUMAN | 1 |
| 399 | 2    | 2.3 Q9P2J5 SYLC   | Leucine--tRNA ligase, cytoplasmic                                 | HUMAN | 1 |
| 400 | 2    | 4.3 Q9UQ80 PA2G4  | Proliferation-associated protein 2G4                              | HUMAN | 1 |
| 401 | 2    | 8.4 Q9Y3E5 PTH2   | Peptidyl-tRNA hydrolase 2, mitochondrial                          | HUMAN | 1 |
| 402 | 2    | 4.6 Q9Y3F4 STRAP  | Serine-threonine kinase receptor-associated protein               | HUMAN | 1 |
| 403 | 2    | 8.5 Q9Y676 RT18B  | 28S ribosomal protein S18b, mitochondrial                         | HUMAN | 1 |
| 404 | 2    | 4.3 Q9Y6K0 CEPT1  | Choline/ethanolaminephosphotransferase 1                          | HUMAN | 1 |
| 405 | 1.96 | 2.5 Q7L0Y3 MRRP1  | Mitochondrial ribonuclease P protein 1                            | HUMAN | 1 |
| 406 | 1.96 | 1.8 P49588 SYAC   | Alanine--tRNA ligase, cytoplasmic                                 | HUMAN | 1 |
| 407 | 1.94 | 7.2 Q99873 ANM1   | Protein arginine N-methyltransferase 1                            | HUMAN | 1 |
| 408 | 1.92 | 1.3 P49736 MCM2   | DNA replication licensing factor MCM2                             | HUMAN | 1 |
| 409 | 1.92 | 6.1 Q9BSH4 TACO1  | Translational activator of cytochrome c oxidase 1                 | HUMAN | 1 |
| 410 | 1.92 | 7 Q95870 ABHGA    | Protein ABHD16A                                                   | HUMAN | 1 |
| 411 | 1.92 | 2.8 P0CW18 PR556  | Serine protease 56                                                | HUMAN | 1 |
| 412 | 1.92 | 4.9 P62701 RS4X   | 40S ribosomal protein S4, X isoform                               | HUMAN | 1 |
| 413 | 1.9  | 17.5 Q56VL3 OCAD2 | OCIA domain-containing protein 2                                  | HUMAN | 1 |
| 414 | 1.87 | 14.8 Q8N5K1 CISD2 | CDGSH iron-sulfur domain-containing protein 2                     | HUMAN | 2 |
| 415 | 1.83 | 3.3 Q6PI48 SYDM   | Aspartate--tRNA ligase, mitochondrial                             | HUMAN | 1 |
| 416 | 1.8  | 19.5 P12236 ADT3  | ADP/ATP translocase 3                                             | HUMAN | 7 |
| 417 | 1.8  | 1.7 A0FGR8 ESYT2  | Extended synaptotagmin-2                                          | HUMAN | 1 |
| 418 | 1.8  | 10.6 P18085 ARF4  | ADP-ribosylation factor 4                                         | HUMAN | 2 |
| 419 | 1.77 | 1.7 Q14CZ7 FAKD3  | FAST kinase domain-containing protein 3, mitochondrial            | HUMAN | 1 |
| 420 | 1.77 | 1.6 Q15031 SYLM   | Probable leucine--tRNA ligase, mitochondrial                      | HUMAN | 1 |
| 421 | 1.74 | 7.6 P42126 ECI1   | Enoyl-CoA delta isomerase 1, mitochondrial                        | HUMAN | 2 |
| 422 | 1.72 | 10.7 P30084 ECHM  | Enoyl-CoA hydratase, mitochondrial                                | HUMAN | 2 |
| 423 | 1.7  | 6.8 P40926 MDHM   | Malate dehydrogenase, mitochondrial                               | HUMAN | 1 |
| 424 | 1.7  | 1.3 Q12769 NU160  | Nuclear pore complex protein Nup160                               | HUMAN | 2 |
| 425 | 1.7  | 1.1 Q5J TZ9 SYAM  | Alanine--tRNA ligase, mitochondrial                               | HUMAN | 1 |
| 426 | 1.68 | 5.7 P62829 RL23   | 60S ribosomal protein L23                                         | HUMAN | 1 |
| 427 | 1.66 | 6.3 O75306 NDUS2  | NADH dehydrogenase [ubiquinone] iron-sulfur protein 2, mitochondr | HUMAN | 2 |
| 428 | 1.6  | 0.4 O60318 GANP   | Germinal-center associated nuclear protein                        | HUMAN | 1 |
| 429 | 1.5  | 2.8 Q92973 TNPO1  | Transportin-1                                                     | HUMAN | 1 |
| 430 | 1.49 | 2.1 O43684 BUB3   | Mitotic checkpoint protein BUB3                                   | HUMAN | 1 |
| 431 | 1.49 | 2.1 Q96CU9 FXRD1  | FAD-dependent oxidoreductase domain-containing protein 1          | HUMAN | 1 |
| 432 | 1.46 | 1.3 Q09161 NCBP1  | Nuclear cap-binding protein subunit 1                             | HUMAN | 1 |
| 433 | 1.44 | 1.3 Q8TAD4 ZNT5   | Zinc transporter 5                                                | HUMAN | 1 |
| 434 | 1.43 | 3.2 Q9BZE4 NOG1   | Nucleolar GTP-binding protein 1                                   | HUMAN | 1 |
| 435 | 1.4  | 9.5 P20618 PSB1   | Proteasome subunit beta type-1                                    | HUMAN | 2 |
| 436 | 1.38 | 5.6 Q4J6C6 PPCEL  | Prolyl endopeptidase-like                                         | HUMAN | 3 |
| 437 | 1.34 | 5.3 Q9NPL8 TIDC1  | Complex I assembly factor TIMMDC1, mitochondrial                  | HUMAN | 1 |
| 438 | 1.33 | 1.2 Q3SY69 AL1L2  | Mitochondrial 10-formyltetrahydrofolate dehydrogenase             | HUMAN | 1 |
| 439 | 1.32 | 5 O00299 CLIC1    | Chloride intracellular channel protein 1                          | HUMAN | 1 |
| 440 | 1.32 | 6.6 O14684 PTGES  | Prostaglandin E synthase                                          | HUMAN | 1 |
| 441 | 1.31 | 5.3 P62241 RS8    | 40S ribosomal protein S8                                          | HUMAN | 1 |
| 442 | 1.3  | 5.4 P22830 HEMH   | Ferrochelatase, mitochondrial                                     | HUMAN | 1 |

1. Unused Score, unused protein score. For the target identification, a strict total score cut-off of 1.3 was set as the qualification criterion, which corresponded to a protein confidence interval of 95%.
2. % Cov (95), percent protein sequence coverage with the identified peptides.
